# Supplementary material for: Comparative and phylogenetic analysis of chloroplast genomes from ten species in Quercus section Cyclobalanopsis
Source: Front Plant Sci. 2024 Aug 19;15:1430191. doi: 10.3389/fpls.2024.1430191 (PMC11366656; doi:10.3389/fpls.2024.1430191)
Supplement: Supplementary file 6 [file Table6.xlsx]

## Sheet: Sheet1
Supplementary Table S6. The nucleotide variability (Pi) of 10 Quercus section Cyclobalanopsis CPGs
#number of species: 10
#aligned length: 161516
#conserved length: 159979
#window length: 400
#step size: 200
#Nucleotide diversity, Pi: 0.00048
#Number of polymorphic (segregating) sites, S: 269
#===================================
#Window	Midpoint	Pi	S	gene(Based on the midpoint pos)
1-410	202	0.00478	6	trnH-psbA
203-610	410	0.00528	7	trnH-psbA
411-810	610	0.0005	1	psbA
611-1010	810	0	0	psbA
811-1210	1010	0	0	psbA
1011-1410	1210	0	0	psbA
1211-1610	1410	0	0	psbA
1411-1811	1610	0	0	psbA-trnK-exon2
1611-2011	1811	0.00133	1	psbA-trnK-exon2
1812-2211	2011	0.00183	2	trnK-exon2-matK
2012-2411	2211	0.0005	1	matK
2212-2611	2411	0	0	matK
2412-2811	2611	0.0005	1	matK
2612-3011	2811	0.0005	1	matK
2812-3211	3011	0	0	matK
3012-3411	3211	0	0	matK
3212-3611	3411	0	0	matK
3412-3811	3611	0.0005	1	matK
3612-4012	3811	0.00139	2	matK-trnK-exon1
3812-4212	4012	0.00089	1	matK-trnK-exon1
4013-4412	4212	0	0	matK-trnK-exon1
4213-4622	4412	0	0	trnK-exon1
4413-4880	4622	0.00183	2	trnK-exon1-rps16-exon2
4623-5084	4880	0.00283	4	trnK-exon1-rps16-exon2
4881-5287	5084	0.001	2	trnK-exon1-rps16-exon2
5085-5503	5287	0.01067	12	trnK-exon1-rps16-exon2
5288-5703	5503	0.01067	12	trnK-exon1-rps16-exon2
5504-5903	5703	0	0	rps16-exon2
5704-6103	5903	0	0	rps16-exon2-rps16-exon1
5904-6303	6103	0	0	rps16-exon2-rps16-exon1
6104-6503	6303	0	0	rps16-exon2-rps16-exon1
6304-6703	6503	0	0	rps16-exon2-rps16-exon1
6504-6913	6703	0	0	rps16-exon1-trnQ
6704-7113	6913	0.0005	1	rps16-exon1-trnQ
6914-7323	7113	0.0005	1	rps16-exon1-trnQ
7114-7523	7323	0.0005	1	rps16-exon1-trnQ
7324-7723	7523	0.0005	1	rps16-exon1-trnQ
7524-7923	7723	0	0	rps16-exon1-trnQ
7724-8162	7923	0	0	rps16-exon1-trnQ
7924-8362	8162	0	0	rps16-exon1-trnQ
8163-8565	8362	0.00133	1	trnQ-psbK
8363-8765	8565	0.00133	1	trnQ-psbK
8566-8965	8765	0.0005	1	psbK
8766-9165	8965	0.001	2	psbK-psbI
8966-9372	9165	0.0005	1	psbI
9166-9573	9372	0	0	psbI-trnS
9373-9783	9573	0	0	trnS-trnG-exon1
9574-9983	9783	0	0	trnS-trnG-exon1
9784-10290	9983	0	0	trnS-trnG-exon1
9984-10496	10290	0	0	trnS-trnG-exon1
10291-10696	10496	0	0	trnS-trnG-exon1
10497-10896	10696	0	0	trnG-exon1-trnG-exon2
10697-11096	10896	0	0	trnG-exon1-trnG-exon2
10897-11297	11096	0.001	2	trnG-exon1-trnG-exon2
11097-11497	11297	0.001	2	trnG-exon1-trnG-exon2
11298-11697	11497	0.00089	1	trnG-exon2-trnR
11498-11897	11697	0.00089	1	trnR
11698-12097	11897	0	0	trnR-atpA
11898-12297	12097	0	0	atpA
12098-12497	12297	0	0	atpA
12298-12697	12497	0	0	atpA
12498-12897	12697	0	0	atpA
12698-13097	12897	0	0	atpA
12898-13297	13097	0	0	atpA
13098-13497	13297	0	0	atpA
13298-13701	13497	0	0	atpA-atpF-exon2
13498-13901	13701	0	0	atpF-exon2
13702-14102	13901	0	0	atpF-exon2
13902-14304	14102	0	0	atpF-exon2-atpF-exon1
14103-14504	14304	0	0	atpF-exon2-atpF-exon1
14305-14704	14504	0	0	atpF-exon2-atpF-exon1
14505-14904	14704	0	0	atpF-exon2-atpF-exon1
14705-15104	14904	0	0	atpF-exon1-atpH
14905-15308	15104	0	0	atpF-exon1-atpH
15105-15508	15308	0	0	atpH
15309-15708	15508	0	0	atpH
15509-15908	15708	0	0	atpH-atpI
15709-16110	15908	0	0	atpH-atpI
15909-16312	16110	0	0	atpH-atpI
16113-16513	16312	0	0	atpH-atpI
16313-16713	16513	0	0	atpH-atpI
16514-16913	16713	0	0	atpH-atpI
16714-17113	16913	0	0	atpI
16914-17313	17113	0	0	atpI
17114-17513	17313	0	0	atpI
17314-17713	17513	0	0	atpI-rps2
17514-17913	17713	0.00089	1	rps2
17714-18113	17913	0.00089	1	rps2
17914-18313	18113	0	0	rps2
18114-18513	18313	0	0	rps2
18314-18731	18513	0.0005	1	rps2-rpoC2
18514-18931	18731	0.001	2	rpoC2
18732-19131	18931	0.0005	1	rpoC2
18932-19331	19131	0	0	rpoC2
19132-19531	19331	0	0	rpoC2
19332-19731	19531	0	0	rpoC2
19532-19931	19731	0	0	rpoC2
19732-20131	19931	0	0	rpoC2
19932-20331	20131	0	0	rpoC2
20132-20531	20331	0	0	rpoC2
20332-20731	20531	0	0	rpoC2
20532-20931	20731	0	0	rpoC2
20732-21131	20931	0.0005	1	rpoC2
20932-21331	21131	0.0005	1	rpoC2
21132-21531	21331	0	0	rpoC2
21332-21731	21531	0	0	rpoC2
21532-21931	21731	0.0005	1	rpoC2
21732-22131	21931	0.0005	1	rpoC2
21932-22331	22131	0	0	rpoC2
22132-22531	22331	0.0005	1	rpoC2
22332-22731	22531	0.0005	1	rpoC2
22532-22931	22731	0	0	rpoC2
22732-23131	22931	0.0005	1	rpoC2-rpoC1(exon2)
22932-23331	23131	0.001	2	rpoC1(exon2)
23132-23531	23331	0.0005	1	rpoC1(exon2)
23332-23731	23531	0	0	rpoC1(exon2)
23532-23931	23731	0.00089	1	rpoC1(exon2)
23732-24131	23931	0.00089	1	rpoC1(exon2)
23932-24331	24131	0	0	rpoC1(exon2)
24132-24531	24331	0.0005	1	rpoC1(exon2)
24332-24731	24531	0.0005	1	rpoC1(exon2)
24532-24950	24731	0.002	4	rpoC1(exon2)-rpoC1(exon1)
24732-25150	24950	0.00289	5	rpoC1(exon2)-rpoC1(exon1)
24951-25352	25150	0.00089	1	rpoC1(exon2)-rpoC1(exon1)
25151-25552	25352	0	0	rpoC1(exon2)-rpoC1(exon1)
25353-25752	25552	0	0	rpoC1(exon1)
25553-25952	25752	0	0	rpoC1(exon1)
25753-26152	25952	0	0	rpoC1(exon1)
25953-26352	26152	0.0005	1	rpoB
26153-26552	26352	0.0005	1	rpoB
26353-26752	26552	0	0	rpoB
26553-26952	26752	0.0005	1	rpoB
26753-27152	26952	0.0005	1	rpoB
26953-27352	27152	0	0	rpoB
27153-27552	27352	0	0	rpoB
27353-27752	27552	0	0	rpoB
27553-27952	27752	0	0	rpoB
27753-28152	27952	0.001	2	rpoB
27953-28352	28152	0.00233	3	rpoB
28153-28552	28352	0.00133	1	rpoB
28353-28752	28552	0	0	rpoB
28553-28952	28752	0	0	rpoB
28753-29152	28952	0	0	rpoB
28953-29352	29152	0	0	rpoB
29153-29552	29352	0.00283	4	rpoB-trnC
29353-29753	29552	0.00372	5	rpoB-trnC
29553-29956	29753	0.00139	2	rpoB-trnC
29754-30156	29956	0.00139	2	rpoB-trnC
29957-30356	30156	0.00189	3	rpoB-trnC
30157-30710	30356	0.0015	3	rpoB-trnC
30357-30910	30710	0.0005	1	trnC-petN
30711-31110	30910	0.0005	1	trnC-petN
30911-31310	31110	0.001	2	trnC-petN
31111-31510	31310	0.0005	1	trnC-petN
31311-31710	31510	0.0005	1	trnC-petN
31511-31913	31710	0.0005	1	petN
31711-32113	31913	0.0015	3	petN-psbM
31914-32315	32113	0.0015	3	petN-psbM
32114-32515	32315	0	0	petN-psbM
32316-32715	32515	0	0	petN-psbM
32516-32915	32715	0	0	petN-psbM
32716-33115	32915	0	0	psbM-trnD
32916-33482	33115	0.0005	1	psbM-trnD
33116-33695	33482	0.001	2	psbM-trnD
33483-33895	33695	0.0005	1	psbM-trnD
33696-34095	33895	0	0	psbM-trnD
33896-34298	34095	0	0	trnD-trnY
34096-34498	34298	0	0	trnD-trnY
34299-34698	34498	0	0	trnD-trnY
34499-34898	34698	0	0	trnE
34699-35104	34898	0.0005	1	trnE-trnT
34899-35305	35104	0.0005	1	trnE-trnT
35105-35505	35305	0.0005	1	trnE-trnT
35306-35705	35505	0.001	2	trnE-trnT
35506-35905	35705	0.0005	1	trnE-trnT
35706-36117	35905	0	0	trnT-psbD
35906-36317	36117	0	0	trnT-psbD
36118-36517	36317	0.0005	1	trnT-psbD
36318-36717	36517	0.002	4	trnT-psbD
36518-36918	36717	0.0015	3	trnT-psbD
36718-37118	36918	0.0005	1	trnT-psbD
36919-37318	37118	0.0005	1	trnT-psbD
37119-37518	37318	0	0	trnT-psbD
37319-37718	37518	0	0	psbD
37519-37918	37718	0	0	psbD
37719-38118	37918	0	0	psbD
37919-38318	38118	0	0	psbD
38119-38518	38318	0	0	psbD
38319-38718	38518	0	0	psbD/psbC
38519-38918	38718	0	0	psbC
38719-39118	38918	0	0	psbC
38919-39318	39118	0.0005	1	psbC
39119-39518	39318	0.0005	1	psbC
39319-39718	39518	0	0	psbC
39519-39918	39718	0	0	psbC
39719-40118	39918	0.00533	6	psbC-trnS
39919-40322	40118	0.00633	8	psbC-trnS
40119-40523	40322	0.0015	3	trnS-psbZ
40323-40723	40523	0.0005	1	trnS-psbZ
40524-40923	40723	0.0005	1	psbZ
40724-41136	40923	0.0005	1	psbZ-trnG
40924-41336	41136	0	0	psbZ-trnG
41137-41536	41336	0	0	psbZ-trnG
41337-41738	41536	0	0	trnG-trnfM
41537-41938	41738	0	0	trnfM
41739-42138	41938	0.00133	1	trnfM-rps14
41939-42338	42138	0.00133	1	rps14
42139-42573	42338	0	0	rps14-psaB
42339-42773	42573	0	0	psaB
42574-42973	42773	0	0	psaB
42774-43173	42973	0	0	psaB
42974-43373	43173	0	0	psaB
43174-43573	43373	0	0	psaB
43374-43773	43573	0	0	psaB
43574-43973	43773	0	0	psaB
43774-44173	43973	0	0	psaB
43974-44373	44173	0.00133	1	psaB
44174-44573	44373	0.00183	2	psaB
44374-44773	44573	0.0005	1	psaB
44574-44973	44773	0	0	psaA
44774-45173	44973	0	0	psaA
44974-45373	45173	0	0	psaA
45174-45573	45373	0	0	psaA
45374-45773	45573	0	0	psaA
45574-45973	45773	0	0	psaA
45774-46173	45973	0	0	psaA
45974-46373	46173	0	0	psaA
46174-46573	46373	0	0	psaA
46374-46773	46573	0	0	psaA
46574-46973	46773	0	0	psaA
46774-47173	46973	0.0005	1	psaA-ycf3-exon3
46974-47373	47173	0.0005	1	psaA-ycf3-exon3
47174-47592	47373	0	0	psaA-ycf3-exon3
47374-47792	47592	0	0	psaA-ycf3-exon3
47593-47992	47792	0	0	ycf3-exon3-ycf3-exon2
47793-48201	47992	0	0	ycf3-exon3-ycf3-exon2
47993-48401	48201	0	0	ycf3-exon3-ycf3-exon2
48202-48601	48401	0	0	ycf3-exon3-ycf3-exon2
48402-48801	48601	0	0	ycf3-exon2
48602-49001	48801	0	0	ycf3-exon2-ycf3-exon1
48802-49201	49001	0	0	ycf3-exon2-ycf3-exon1
49002-49401	49201	0.0005	1	ycf3-exon2-ycf3-exon1
49202-49601	49401	0.001	2	ycf3-exon2-ycf3-exon1
49402-49802	49601	0.0005	1	ycf3-exon1
49602-50012	49802	0.0005	1	ycf3-exon1-trnS
49803-50214	50012	0.0005	1	ycf3-exon1-trnS
50013-50416	50214	0.0005	1	ycf3-exon1-trnS
50215-50616	50416	0.0005	1	ycf3-exon1-trnS
50417-50816	50616	0	0	trnS
50617-51016	50816	0	0	trnS-rps4
50817-51216	51016	0.0005	1	rps4
51017-51416	51216	0.0005	1	rps4
51217-51616	51416	0.0005	1	rps4
51417-51818	51616	0.0005	1	rps4-trnT
51617-52023	51818	0.00089	1	rps4-trnT
51819-52223	52023	0.00189	3	trnT-trnL-exon1
52024-52423	52223	0.0015	3	trnT-trnL-exon1
52224-52624	52423	0.001	2	trnT-trnL-exon1
52424-52824	52624	0.0005	1	trnT-trnL-exon1
52625-53024	52824	0	0	trnL-exon1-trnL-exon2
52825-53224	53024	0.00089	1	trnL-exon1-trnL-exon2
53025-53424	53224	0.00139	2	trnL-exon1-trnL-exon2
53225-53624	53424	0.001	2	trnL-exon2-trnF
53425-53824	53624	0.001	2	trnL-exon2-trnF
53625-54046	53824	0.0015	3	trnF-ndhJ
53825-54246	54046	0.001	2	trnF-ndhJ
54047-54448	54246	0	0	trnF-ndhJ
54247-54649	54448	0	0	trnF-ndhJ
54449-54857	54649	0.0005	1	trnF-ndhJ
54650-55057	54857	0.0005	1	ndhJ
54858-55257	55057	0	0	ndhJ
55058-55459	55257	0	0	ndhJ-ndhK
55258-55659	55459	0	0	ndhK
55460-55859	55659	0.0005	1	ndhK
55660-56061	55859	0.00167	2	ndhK
55860-56261	56061	0.00167	2	ndhK-ndhC
56062-56461	56261	0.0005	1	ndhC
56262-56661	56461	0.0005	1	ndhC-trnV-exon2
56462-56878	56661	0.0005	1	ndhC-trnV-exon2
56662-57078	56878	0	0	ndhC-trnV-exon2
56879-57278	57078	0.0005	1	trnV-exon2-trnV-exon1
57079-57479	57278	0.0005	1	trnV-exon2-trnV-exon1
57279-57679	57479	0	0	trnV-exon2-trnV-exon1
57480-57879	57679	0	0	trnV-exon1-trnM
57680-58079	57879	0	0	trnM-atpE
57880-58279	58079	0	0	atpE
58080-58479	58279	0.0005	1	atpE
58280-58679	58479	0.00139	2	atpB
58480-58879	58679	0.00089	1	atpB
58680-59079	58879	0	0	atpB
58880-59279	59079	0	0	atpB
59080-59479	59279	0.0005	1	atpB
59280-59679	59479	0.0005	1	atpB
59480-59879	59679	0	0	atpB
59680-60084	59879	0	0	atpB
59880-60284	60084	0	0	atpB-rbcL
60085-60485	60284	0.00089	1	atpB-rbcL
60285-60685	60485	0.00089	1	atpB-rbcL
60486-60885	60685	0	0	atpB-rbcL
60686-61085	60885	0	0	rbcL
60886-61285	61085	0	0	rbcL
61086-61485	61285	0.00161	1	rbcL
61286-61685	61485	0.00211	2	rbcL
61486-61885	61685	0.0005	1	rbcL
61686-62085	61885	0	0	rbcL
61886-62285	62085	0	0	rbcL
62086-62485	62285	0	0	rbcL-accD
62286-62685	62485	0.02533	22	rbcL-accD
62486-62885	62685	0.02533	22	rbcL-accD
62686-63085	62885	0	0	accD
62886-63285	63085	0	0	accD
63086-63485	63285	0	0	accD
63286-63685	63485	0	0	accD
63486-63885	63685	0	0	accD
63686-64085	63885	0	0	accD
63886-64285	64085	0	0	accD
64086-64612	64285	0	0	accD
64286-64812	64612	0	0	accD-psaI
64613-65012	64812	0	0	accD-psaI
64813-65212	65012	0	0	accD-psaI
65013-65414	65212	0	0	psaI-ycf4
65213-65614	65414	0	0	psaI-ycf4
65415-65814	65614	0	0	psaI-ycf4
65615-66014	65814	0.00089	1	ycf4
65815-66214	66014	0.00089	1	ycf4
66015-66418	66214	0.0005	1	ycf4-cemA
66215-66625	66418	0.0005	1	ycf4-cemA
66419-66825	66625	0	0	ycf4-cemA
66626-67025	66825	0	0	ycf4-cemA
66826-67225	67025	0	0	cemA
67026-67425	67225	0	0	cemA
67226-67625	67425	0	0	cemA
67426-67825	67625	0.0005	1	cemA-petA
67626-68025	67825	0.0005	1	petA
67826-68225	68025	0	0	petA
68026-68425	68225	0	0	petA
68226-68625	68425	0	0	petA
68426-68825	68625	0	0	petA
68626-69033	68825	0	0	petA-psbJ
68826-69233	69033	0	0	petA-psbJ
69034-69435	69233	0	0	petA-psbJ
69234-69635	69435	0.0005	1	petA-psbJ
69436-69835	69635	0.0005	1	petA-psbJ
69636-70035	69835	0	0	psbJ
69836-70235	70035	0	0	psbL
70036-70435	70235	0.00089	1	psbF
70236-70635	70435	0.00089	1	psbE
70436-70835	70635	0	0	psbE-petL
70636-71040	70835	0.0005	1	psbE-petL
70836-71243	71040	0.00189	3	psbE-petL
71043-71470	71243	0.00139	2	psbE-petL
71244-71670	71470	0.0005	1	psbE-petL
71471-71871	71670	0.0005	1	psbE-petL
71671-72071	71871	0	0	psbE-petL
71872-72271	72071	0	0	petL-petG
72072-72471	72271	0.00183	2	petG-trnW
72272-72671	72471	0.00183	2	trnW
72472-72871	72671	0.0005	1	trnP
72672-73071	72871	0.00183	2	trnP-psaJ
72872-73271	73071	0.00133	1	trnP-psaJ
73072-73471	73271	0.00139	2	psaJ-rpl33
73272-73671	73471	0.00139	2	psaJ-rpl33
73472-73871	73671	0.0005	1	psaJ-rpl33
73672-74071	73871	0.0005	1	rpl33
73872-74271	74071	0.00133	1	rpl33-rps18
74072-74471	74271	0.00133	1	rps18
74272-74671	74471	0.0005	1	rps18
74472-74871	74671	0.001	2	rps18-rpl20
74672-75071	74871	0.0005	1	rpl20
74872-75272	75071	0.0005	1	rpl20-rps12-exon1
75072-75473	75272	0.0005	1	rpl20-rps12-exon1
75273-75673	75473	0	0	rpl20-rps12-exon1
75474-75873	75673	0	0	rpl20-rps12-exon1
75674-76073	75873	0	0	rpl20-rps12-exon1
75874-76274	76073	0	0	rps12-exon1-clpP-exon3
76074-76474	76274	0	0	clpP-exon3
76275-76674	76474	0.0005	1	clpP-exon3-clpP-exon2
76475-76874	76674	0.0005	1	clpP-exon3-clpP-exon2
76675-77084	76874	0.0005	1	clpP-exon3-clpP-exon2
76875-77284	77084	0.0005	1	clpP-exon2
77085-77485	77284	0	0	clpP-exon2
77285-77685	77485	0	0	clpP-exon2-clpP-exon1
77486-77885	77685	0	0	clpP-exon2-clpP-exon1
77686-78085	77885	0.00189	3	clpP-exon2-clpP-exon1
77886-78285	78085	0.00189	3	clpP-exon2-clpP-exon1
78086-78485	78285	0	0	clpP-exon1-psbB
78286-78685	78485	0	0	clpP-exon1-psbB
78486-78885	78685	0	0	clpP-exon1-psbB
78686-79085	78885	0	0	psbB
78886-79285	79085	0	0	psbB
79086-79485	79285	0	0	psbB
79286-79685	79485	0	0	psbB
79486-79885	79685	0	0	psbB
79686-80085	79885	0.0005	1	psbB
79886-80285	80085	0.0005	1	psbB
80086-80485	80285	0	0	psbB-psbT
80286-80685	80485	0.0005	1	psbT
80486-80885	80685	0.0005	1	psbN
80686-81085	80885	0	0	psbH
80886-81285	81085	0	0	psbH-petB-exon1
81086-81485	81285	0	0	petB-exon1-petB-exon2
81286-81685	81485	0	0	petB-exon1-petB-exon2
81486-81888	81685	0	0	petB-exon1-petB-exon2
81686-82088	81888	0.0005	1	petB-exon1-petB-exon2
81889-82288	82088	0.0005	1	petB-exon2
82089-82488	82288	0	0	petB-exon2
82289-82688	82488	0	0	petB-exon2
82489-82888	82688	0	0	petB-exon2-petD-exon1
82689-83088	82888	0	0	petD-exon1
82889-83288	83088	0	0	petD-exon1-petD-exon2
83089-83488	83288	0.0005	1	petD-exon1-petD-exon2
83289-83688	83488	0.0005	1	petD-exon1-petD-exon2
83489-83888	83688	0	0	petD-exon2
83689-84088	83888	0.0005	1	petD-exon2
83889-84290	84088	0.001	2	petD-exon2-rpoA
84089-84490	84290	0.0005	1	rpoA
84291-84690	84490	0	0	rpoA
84491-84890	84690	0	0	rpoA
84691-85090	84890	0	0	rpoA
84891-85290	85090	0	0	rpoA
85091-85490	85290	0	0	rps11
85291-85690	85490	0	0	rps11
85491-85890	85690	0.00183	2	rps11
85691-86091	85890	0.00233	3	rpl36
85891-86291	86091	0.00217	3	infA
86092-86493	86291	0.00167	2	infA
86292-86693	86493	0	0	rps8
86494-86893	86693	0	0	rps8
86694-87093	86893	0	0	rps8-rpl14
86894-87293	87093	0.0005	1	rpl14
87094-87502	87293	0.0005	1	rpl14
87294-87702	87502	0.0005	1	rpl14-rpl16-exon2
87503-87902	87702	0.0005	1	rpl16-exon2
87703-88102	87902	0	0	rpl16-exon2
87903-88302	88102	0	0	rpl16-exon2-rpl16-exon1
88103-88502	88302	0	0	rpl16-exon2-rpl16-exon1
88303-88702	88502	0	0	rpl16-exon2-rpl16-exon1
88503-88902	88702	0.0005	1	rpl16-exon2-rpl16-exon1
88703-89106	88902	0.001	2	rpl16-exon2-rpl16-exon1
88903-89306	89106	0.0005	1	rpl16-exon1-rps3
89107-89506	89306	0	0	rps3
89307-89706	89506	0	0	rps3
89507-89906	89706	0	0	rps3
89707-90106	89906	0.0015	3	rps3-rpl22
89907-90306	90106	0.00333	5	rpl22
90107-90506	90306	0.00183	2	rpl22-rps19
90307-90706	90506	0.0005	1	rps19
90507-90911	90706	0.0005	1	rps19-rpl2-exon2
90707-91111	90911	0	0	rpl2-exon2
90912-91373	91111	0.002	4	rpl2-exon2
91112-91573	91373	0.002	4	rpl2-exon2-rpl2-exon1
91374-91773	91573	0	0	rpl2-exon2-rpl2-exon1
91574-91973	91773	0	0	rpl2-exon2-rpl2-exon1
91774-92173	91973	0	0	rpl2-exon1
91974-92373	92173	0	0	rpl2-exon1
92174-92573	92373	0	0	rpl23
92374-92773	92573	0	0	rpl23
92574-92973	92773	0	0	rpl23-trnI
92774-93173	92973	0	0	ycf2
92974-93373	93173	0	0	ycf2
93174-93573	93373	0	0	ycf2
93374-93773	93573	0	0	ycf2
93574-93973	93773	0	0	ycf2
93774-94173	93973	0	0	ycf2
93974-94373	94173	0	0	ycf2
94174-94573	94373	0	0	ycf2
94374-94773	94573	0	0	ycf2
94574-94982	94773	0	0	ycf2
94774-95182	94982	0	0	ycf2
94983-95382	95182	0	0	ycf2
95183-95582	95382	0	0	ycf2
95383-95782	95582	0	0	ycf2
95583-95982	95782	0	0	ycf2
95783-96182	95982	0	0	ycf2
95983-96382	96182	0.0005	1	ycf2
96183-96582	96382	0.0005	1	ycf2
96383-96782	96582	0	0	ycf2
96583-96982	96782	0	0	ycf2
96783-97182	96982	0	0	ycf2
96983-97382	97182	0	0	ycf2
97183-97582	97382	0	0	ycf2
97383-97782	97582	0	0	ycf2
97583-97982	97782	0	0	ycf2
97783-98182	97982	0	0	ycf2
97983-98382	98182	0	0	ycf2
98183-98582	98382	0	0	ycf2
98383-98782	98582	0	0	ycf2
98583-98982	98782	0	0	ycf2
98783-99182	98982	0	0	ycf2
98983-99382	99182	0	0	ycf2
99183-99582	99382	0	0	ycf2
99383-99782	99582	0	0	ycf2
99583-99982	99782	0	0	ycf2
99783-100182	99982	0	0	ycf2-trnL
99983-100382	100182	0	0	ycf2-trnL
100183-100582	100382	0	0	ycf2-trnL
100383-100782	100582	0	0	trnL-ndhB-exon2
100583-100982	100782	0	0	trnL-ndhB-exon2
100783-101182	100982	0	0	trnL-ndhB-exon2
100983-101382	101182	0	0	ndhB-exon2
101183-101582	101382	0	0	ndhB-exon2
101383-101782	101582	0	0	ndhB-exon2
101583-101982	101782	0	0	ndhB-exon2
101783-102182	101982	0	0	ndhB-exon2-ndhB-exon1
101983-102382	102182	0	0	ndhB-exon2-ndhB-exon1
102183-102582	102382	0	0	ndhB-exon2-ndhB-exon1
102383-102782	102582	0	0	ndhB-exon1
102583-102982	102782	0	0	ndhB-exon1
102783-103182	102982	0	0	ndhB-exon1
102983-103382	103182	0	0	ndhB-exon1
103183-103582	103382	0	0	ndhB-exon1-rps7
103383-103782	103582	0	0	ndhB-exon1-rps7
103583-103982	103782	0	0	rps7
103783-104182	103982	0	0	rps7
103983-104382	104182	0	0	rps12-exon3-rps12-exon2
104183-104582	104382	0	0	rps12-exon3-rps12-exon2
104383-104782	104582	0	0	rps12-exon3-rps12-exon2
104583-104982	104782	0	0	rps12-exon2
104783-105182	104982	0	0	rps12-exon2-ycf15
104983-105382	105182	0	0	rps12-exon2-ycf15
105183-105582	105382	0	0	rps12-exon2-ycf15
105383-105782	105582	0	0	rps12-exon2-ycf15
105583-105982	105782	0	0	ycf15
105783-106182	105982	0	0	ycf15-trnV
105983-106382	106182	0	0	ycf15-trnV
106183-106582	106382	0	0	ycf15-trnV
106383-106782	106582	0	0	ycf15-trnV
106583-106982	106782	0	0	trnV-rrn16S
106783-107182	106982	0	0	rrn16S
106983-107382	107182	0	0	rrn16S
107183-107582	107382	0	0	rrn16S
107383-107782	107582	0	0	rrn16S
107583-107982	107782	0	0	rrn16S
107783-108182	107982	0	0	rrn16S
107983-108382	108182	0	0	rrn16S
108183-108582	108382	0	0	rrn16S-trnI-exon1
108383-108782	108582	0	0	rrn16S-trnI-exon1
108583-108982	108782	0	0	trnI-exon1-trnI-exon2
108783-109182	108982	0	0	trnI-exon1-trnI-exon2
108983-109382	109182	0	0	trnI-exon1-trnI-exon2
109183-109582	109382	0	0	trnI-exon1-trnI-exon2
109383-109782	109582	0	0	trnI-exon1-trnI-exon2
109583-109982	109782	0	0	trnA-exon1
109783-110182	109982	0	0	trnA-exon1-trnA-exon2
109983-110382	110182	0	0	trnA-exon1-trnA-exon2
110183-110582	110382	0	0	trnA-exon1-trnA-exon2
110383-110782	110582	0	0	trnA-exon1-trnA-exon2
110583-110982	110782	0	0	trnA-exon2-rrn23S
110783-111182	110982	0	0	rrn23S
110983-111382	111182	0	0	rrn23S
111183-111582	111382	0	0	rrn23S
111383-111782	111582	0	0	rrn23S
111583-111982	111782	0	0	rrn23S
111783-112182	111982	0	0	rrn23S
111983-112382	112182	0	0	rrn23S
112183-112582	112382	0	0	rrn23S
112383-112782	112582	0	0	rrn23S
112583-112982	112782	0	0	rrn23S
112783-113182	112982	0	0	rrn23S
112983-113382	113182	0	0	rrn23S
113183-113582	113382	0	0	rrn23S
113383-113782	113582	0	0	rrn23S
113583-113982	113782	0	0	rrn4.5S
113783-114182	113982	0	0	rrn4.5S-rrn5S
113983-114382	114182	0	0	rrn4.5S-rrn5S
114183-114582	114382	0	0	rrn5S
114383-114782	114582	0.0005	1	trnR-trnN
114583-114982	114782	0.0005	1	trnR-trnN
114783-115182	114982	0	0	trnR-trnN
114983-115382	115182	0	0	trnN
115183-115582	115382	0.00133	1	trnN-ycf1
115383-115782	115582	0.00133	1	ycf1
115583-115982	115782	0	0	ycf1
115783-116182	115982	0	0	ycf1
115983-116397	116182	0	0	ycf1
116183-116597	116397	0.0005	1	ycf1
116398-116797	116597	0.001	2	ycf1/ndhF
116598-116997	116797	0.0005	1	ndhF
116798-117197	116997	0	0	ndhF
116998-117397	117197	0.0005	1	ndhF
117198-117597	117397	0.001	2	ndhF
117398-117797	117597	0.001	2	ndhF
117598-117997	117797	0.0005	1	ndhF
117798-118197	117997	0	0	ndhF
117998-118397	118197	0	0	ndhF
118198-118597	118397	0	0	ndhF
118398-118797	118597	0	0	ndhF
118598-119010	118797	0	0	ndhF
118798-119251	119010	0.00339	6	ndhF-rpl32
119011-119453	119251	0.00339	6	ndhF-rpl32
119252-119653	119453	0.00139	2	ndhF-rpl32
119454-119886	119653	0.00139	2	ndhF-rpl32
119654-120086	119886	0.0005	1	rpl32
119887-120288	120086	0.0015	3	rpl32-trnL
120087-120488	120288	0.0015	3	rpl32-trnL
120289-120688	120488	0.0005	1	rpl32-trnL
120489-120888	120688	0	0	rpl32-trnL
120689-121088	120888	0.001	2	rpl32-trnL
120889-121288	121088	0.001	2	rpl32-trnL
121089-121488	121288	0	0	trnL-ccsA
121289-121688	121488	0	0	ccsA
121489-121888	121688	0	0	ccsA
121689-122088	121888	0	0	ccsA
121889-122288	122088	0.0005	1	ccsA
122089-122488	122288	0.001	2	ccsA
122289-122690	122488	0.00139	2	ccsA-ndhD
122489-122890	122690	0.00089	1	ndhD
122691-123090	122890	0.0005	1	ndhD
122891-123290	123090	0.0005	1	ndhD
123091-123490	123290	0	0	ndhD
123291-123690	123490	0	0	ndhD
123491-123890	123690	0	0	ndhD
123691-124090	123890	0	0	ndhD
123891-124290	124090	0.0005	1	ndhD
124091-124490	124290	0.0005	1	psaC
124291-124694	124490	0	0	psaC
124491-124894	124694	0.00133	1	psaC-ndhE
124695-125094	124894	0.00183	2	ndhE
124895-125294	125094	0.001	2	ndhE-ndhG
125095-125494	125294	0.0005	1	ndhE-ndhG
125295-125694	125494	0	0	ndhG
125495-125894	125694	0	0	ndhG
125695-126094	125894	0.0005	1	ndhG-ndhI
125895-126308	126094	0.001	2	ndhG-ndhI
126095-126508	126308	0.0005	1	ndhI
126309-126708	126508	0	0	ndhI
126509-126908	126708	0	0	ndhI
126709-127108	126908	0	0	ndhA-exon2
126909-127308	127108	0.0005	1	ndhA-exon2
127109-127508	127308	0.001	2	ndhA-exon2
127309-127708	127508	0.0005	1	ndhA-exon2-ndhA-exon1
127509-128030	127708	0.00183	2	ndhA-exon2-ndhA-exon1
127709-128238	128030	0.00233	3	ndhA-exon2-ndhA-exon1
128031-128438	128238	0.0005	1	ndhA-exon2-ndhA-exon1
128239-128638	128438	0	0	ndhA-exon2-ndhA-exon1
128439-128838	128638	0	0	ndhA-exon1
128639-129038	128838	0.00089	1	ndhA-exon1
128839-129238	129038	0.00089	1	ndhA-exon1-ndhH
129039-129438	129238	0	0	ndhH
129239-129638	129438	0	0	ndhH
129439-129838	129638	0	0	ndhH
129639-130038	129838	0	0	ndhH
129839-130238	130038	0	0	ndhH
130039-130438	130238	0	0	ndhH-rps15
130239-130638	130438	0.0005	1	rps15
130439-130838	130638	0.0005	1	rps15-ycf1
130639-131040	130838	0	0	rps15-ycf1
130839-131240	131040	0.0005	1	ycf1
131041-131440	131240	0.0005	1	ycf1
131241-131640	131440	0	0	ycf1
131441-131840	131640	0.001	2	ycf1
131641-132040	131840	0.0015	3	ycf1
131841-132240	132040	0.01517	12	ycf1
132041-132440	132240	0.01467	11	ycf1
132241-132640	132440	0	0	ycf1
132441-132840	132640	0	0	ycf1
132641-133040	132840	0	0	ycf1
132841-133240	133040	0.0005	1	ycf1
133041-133440	133240	0.0015	3	ycf1
133241-133640	133440	0.0015	3	ycf1
133441-133840	133640	0.001	2	ycf1
133641-134040	133840	0.001	2	ycf1
133841-134240	134040	0.0005	1	ycf1
134041-134440	134240	0	0	ycf1
134241-134649	134440	0	0	ycf1
134441-134849	134649	0	0	ycf1
134650-135049	134849	0.00139	2	ycf1
134850-135249	135049	0.00139	2	ycf1
135050-135449	135249	0.0005	1	ycf1
135250-135649	135449	0.0005	1	ycf1
135450-135849	135649	0	0	ycf1
135650-136064	135849	0	0	ycf1
135850-136264	136064	0	0	ycf1
136065-136464	136264	0	0	ycf1
136265-136664	136464	0	0	ycf1
136465-136864	136664	0.00133	1	ycf1
136665-137064	136864	0.00133	1	ycf1-trnN
136865-137264	137064	0	0	trnN
137065-137464	137264	0	0	trnN-trnR
137265-137664	137464	0.0005	1	trnN-trnR
137465-137864	137664	0.0005	1	trnN-trnR
137665-138064	137864	0	0	rrn5S
137865-138264	138064	0	0	rrn5S-rrn4.5S
138065-138464	138264	0	0	rrn4.5S
138265-138664	138464	0	0	rrn4.5S
138465-138864	138664	0	0	rrn23S
138665-139064	138864	0	0	rrn23S
138865-139264	139064	0	0	rrn23S
139065-139464	139264	0	0	rrn23S
139265-139664	139464	0	0	rrn23S
139465-139864	139664	0	0	rrn23S
139665-140064	139864	0	0	rrn23S
139865-140264	140064	0	0	rrn23S
140065-140464	140264	0	0	rrn23S
140265-140664	140464	0	0	rrn23S
140465-140864	140664	0	0	rrn23S
140665-141064	140864	0	0	rrn23S
140865-141264	141064	0	0	rrn23S
141065-141464	141264	0	0	rrn23S
141265-141664	141464	0	0	rrn23S-trnA-exon2
141465-141864	141664	0	0	trnA-exon2-trnA-exon1
141665-142064	141864	0	0	trnA-exon2-trnA-exon1
141865-142264	142064	0	0	trnA-exon2-trnA-exon1
142065-142464	142264	0	0	trnA-exon2-trnA-exon1
142265-142664	142464	0	0	trnA-exon1-trnI-exon2
142465-142864	142664	0	0	trnI-exon2-trnI-exon1
142665-143064	142864	0	0	trnI-exon2-trnI-exon1
142865-143264	143064	0	0	trnI-exon2-trnI-exon1
143065-143464	143264	0	0	trnI-exon2-trnI-exon1
143265-143664	143464	0	0	trnI-exon2-trnI-exon1
143465-143864	143664	0	0	trnI-exon1-rrn16S
143665-144064	143864	0	0	rrn16S
143865-144264	144064	0	0	rrn16S
144065-144464	144264	0	0	rrn16S
144265-144664	144464	0	0	rrn16S
144465-144864	144664	0	0	rrn16S
144665-145064	144864	0	0	rrn16S
144865-145264	145064	0	0	rrn16S
145065-145464	145264	0	0	rrn16S
145265-145664	145464	0	0	rrn16S-trnV
145465-145864	145664	0	0	trnV-ycf15
145665-146064	145864	0	0	trnV-ycf15
145865-146264	146064	0	0	trnV-ycf15
146065-146464	146264	0	0	trnV-ycf15
146265-146664	146464	0	0	ycf15
146465-146864	146664	0	0	ycf15-rps12-exon2
146665-147064	146864	0	0	ycf15-rps12-exon2
146865-147264	147064	0	0	ycf15-rps12-exon2
147065-147464	147264	0	0	ycf15-rps12-exon2
147265-147664	147464	0	0	rps12-exon2
147465-147864	147664	0	0	rps12-exon2-rps12-exon3
147665-148064	147864	0	0	rps12-exon2-rps12-exon3
147865-148264	148064	0	0	rps12-exon2-rps12-exon3
148065-148464	148264	0	0	rps7
148265-148664	148464	0	0	rps7
148465-148864	148664	0	0	rps7-ndhB-exon1
148665-149064	148864	0	0	rps7-ndhB-exon1
148865-149264	149064	0	0	ndhB-exon1
149065-149464	149264	0	0	ndhB-exon1
149265-149664	149464	0	0	ndhB-exon1
149465-149864	149664	0	0	ndhB-exon1
149665-150064	149864	0	0	ndhB-exon1-ndhB-exon2
149865-150264	150064	0	0	ndhB-exon1-ndhB-exon2
150065-150464	150264	0	0	ndhB-exon1-ndhB-exon2
150265-150664	150464	0	0	ndhB-exon2
150465-150864	150664	0	0	ndhB-exon2
150665-151064	150864	0	0	ndhB-exon2
150865-151264	151064	0	0	ndhB-exon2
151065-151464	151264	0	0	ndhB-exon2-trnL
151265-151664	151464	0	0	ndhB-exon2-trnL
151465-151864	151664	0	0	ndhB-exon2-trnL
151665-152064	151864	0	0	trnL-ycf2
151865-152264	152064	0	0	trnL-ycf2
152065-152464	152264	0	0	trnL-ycf2
152265-152664	152464	0	0	ycf2
152465-152864	152664	0	0	ycf2
152665-153064	152864	0	0	ycf2
152865-153264	153064	0	0	ycf2
153065-153464	153264	0	0	ycf2
153265-153664	153464	0	0	ycf2
153465-153864	153664	0	0	ycf2
153665-154064	153864	0	0	ycf2
153865-154264	154064	0	0	ycf2
154065-154464	154264	0	0	ycf2
154265-154664	154464	0	0	ycf2
154465-154864	154664	0	0	ycf2
154665-155064	154864	0	0	ycf2
154865-155264	155064	0	0	ycf2
155065-155464	155264	0	0	ycf2
155265-155664	155464	0	0	ycf2
155465-155864	155664	0.0005	1	ycf2
155665-156064	155864	0.0005	1	ycf2
155865-156264	156064	0	0	ycf2
156065-156464	156264	0	0	ycf2
156265-156664	156464	0	0	ycf2
156465-156864	156664	0	0	ycf2
156665-157064	156864	0	0	ycf2
156865-157264	157064	0	0	ycf2
157065-157473	157264	0	0	ycf2
157265-157673	157473	0	0	ycf2
157474-157873	157673	0	0	ycf2
157674-158073	157873	0	0	ycf2
157874-158273	158073	0	0	ycf2
158074-158473	158273	0	0	ycf2
158274-158673	158473	0	0	ycf2
158474-158873	158673	0	0	ycf2
158674-159073	158873	0	0	ycf2
158874-159273	159073	0	0	ycf2
159074-159473	159273	0	0	ycf2
159274-159673	159473	0	0	trnI-rpl23
159474-159873	159673	0	0	rpl23
159674-160073	159873	0	0	rpl23
159874-160273	160073	0	0	rpl2-exon1
160074-160473	160273	0	0	rpl2-exon1
160274-160673	160473	0	0	rpl2-exon1-rpl2-exon2
160474-160913	160673	0	0	rpl2-exon1-rpl2-exon2
160674-161135	160913	0.002	4	rpl2-exon1-rpl2-exon2
160914-161335	161135	0.002	4	rpl2-exon2
161136-161514	161325	0.00141	1	rpl2-exon2
